# Supplementary material for: Post–Chikungunya Virus Infection Musculoskeletal Disorders: Syndromic Sequelae after an Outbreak
Source: Preprints.org preprint supplement (doi:10.20944/preprints202103.0680.v1), 2021-03-29
Supplement: Supplementary file 1 [file supplementary]

| 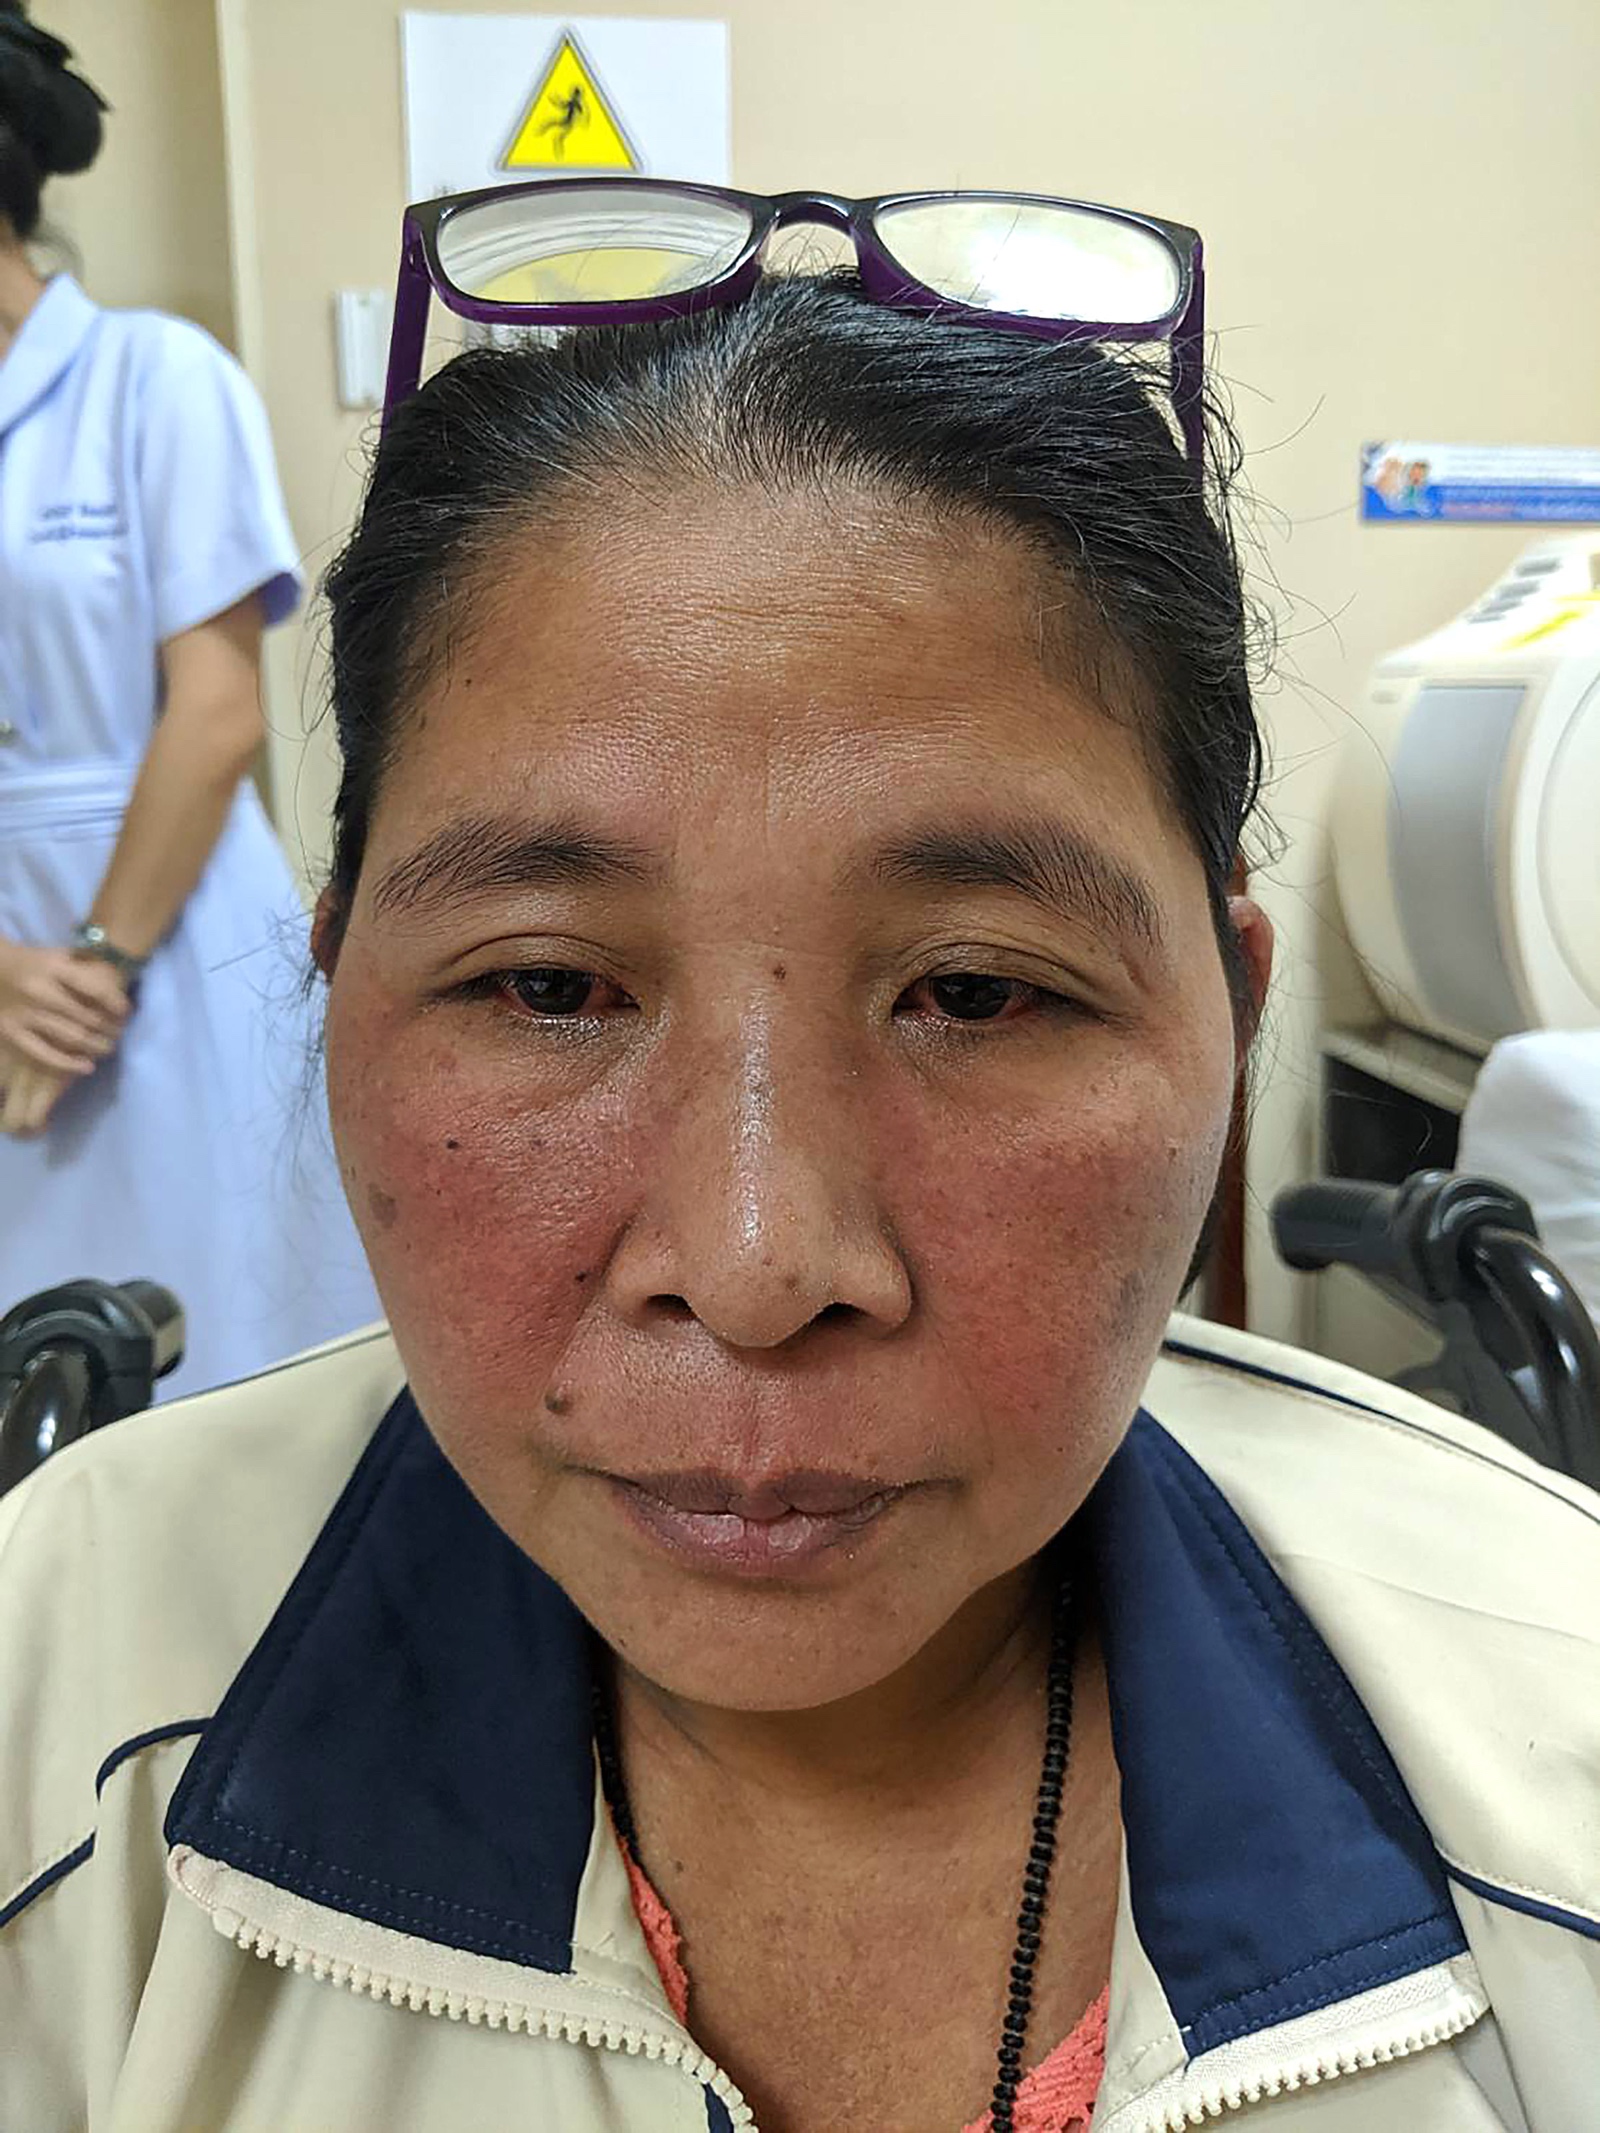 | |
| --- | --- |
| (**a**) | |
| 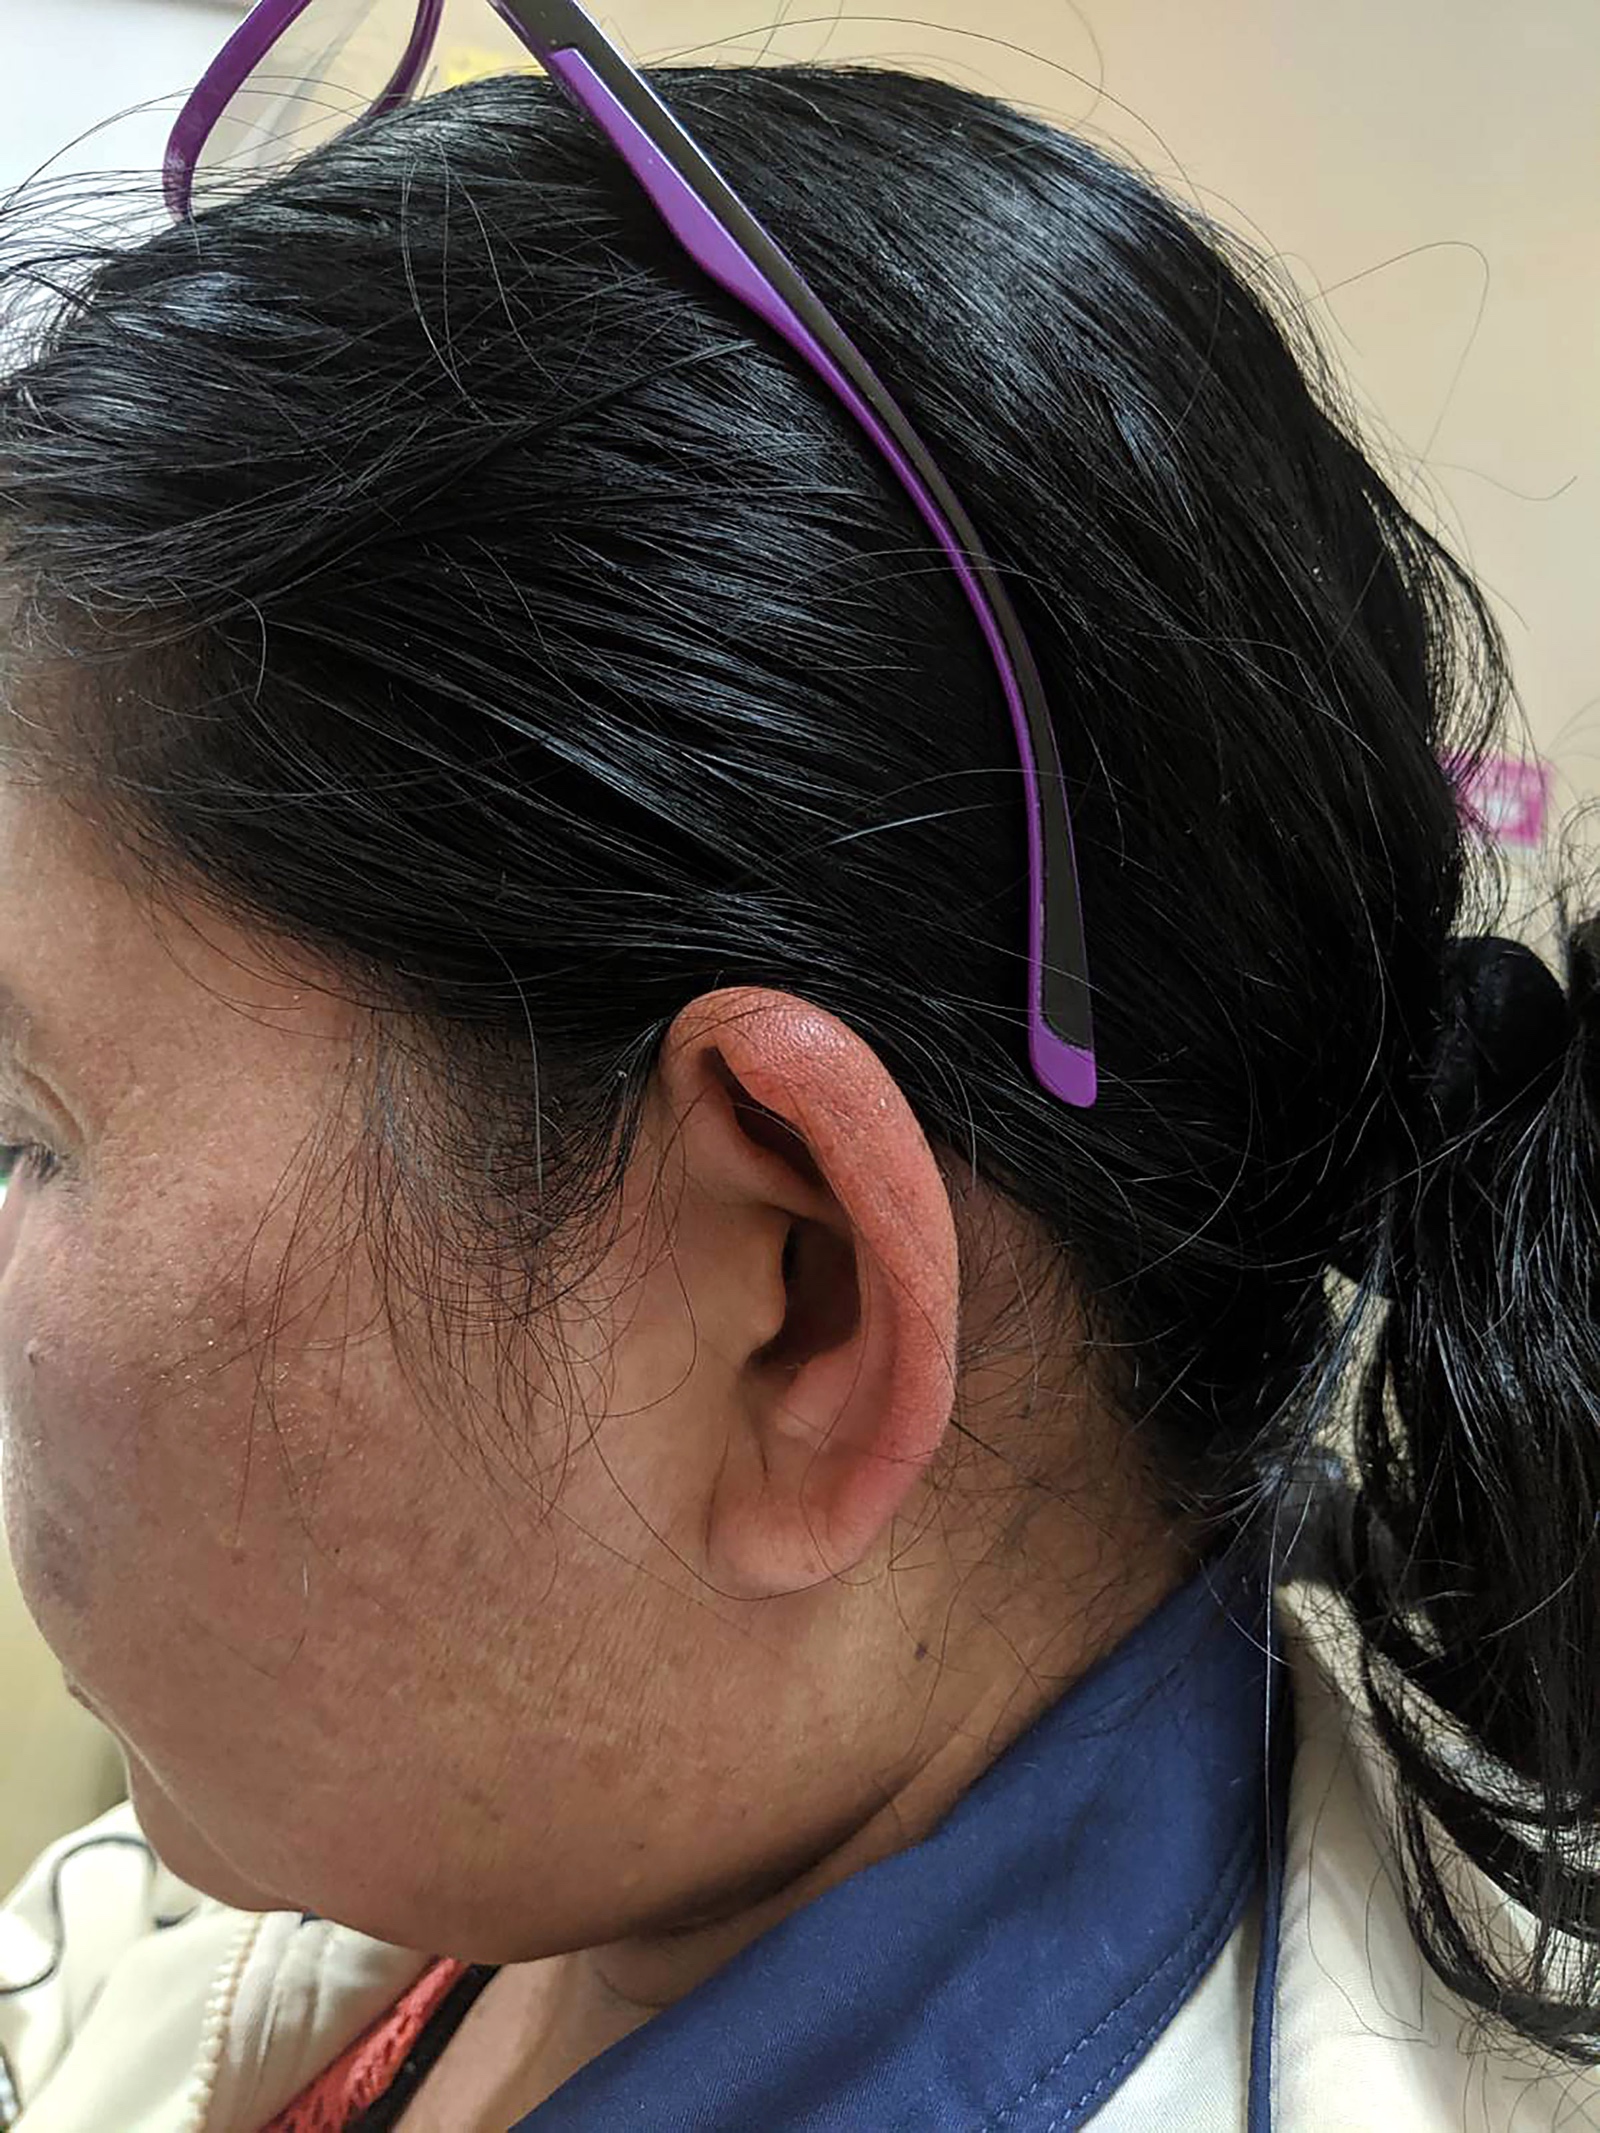 | 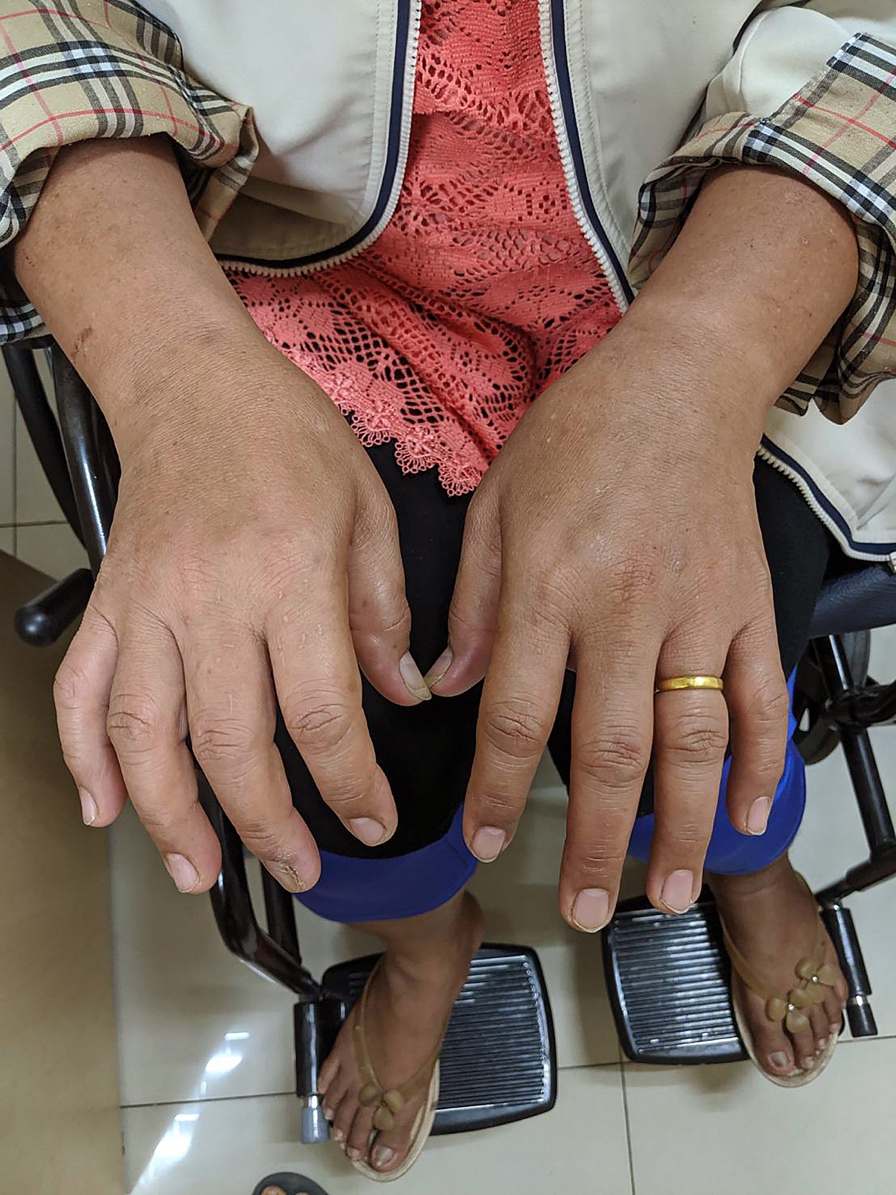 |
| (**b**) | (**c**) |

**Figure S1** Images taken at presentation to the Fever Clinic during the acute CHIKV infection (October 2019). (**a**) Non-purulent conjunctivitis of both eyes and erythema over the cheeks, (**b**) erythema of the pinna (Milians ear sign), (**c**) bilateral swelling of metacarpophalangeal joints and ambulation in a wheel chair due to debilitating arthralgia of the knees.

**Figure S2.** Elapsed time between the initial presentation to the hospital and relapse of symptoms, clinical findings, and investigations performed during each visit.
